1     **A Single Adaptive Mutation in Sodium Taurocholate Cotransporting Polypeptide Induced by**  
2                     **Hepadnaviruses Determines Virus Species-specificity**

3  
4     Junko S Takeuchi<sup>a</sup>, Kento Fukano<sup>a,b</sup>, Masashi Iwamoto<sup>a,c</sup>, Senko Tsukuda<sup>a,d</sup>, Ryosuke Suzuki<sup>a</sup>, Hideki  
5     Aizaki<sup>a</sup>, Masamichi Muramatsu<sup>a</sup>, Takaji Wakita<sup>a</sup>, Camille Sureau<sup>e</sup>, Koichi Watashi<sup>a,f,g,#</sup>

6  
7     <sup>a</sup>Department of Virology II, National Institute of Infectious Diseases, Tokyo, Japan, <sup>b</sup>Department of  
8     Analytical Biochemistry, Meiji Pharmaceutical University, Kiyose, Japan, <sup>c</sup>Department of Biology,  
9     Faculty of Sciences, Kyushu University, Fukuoka, Japan, <sup>d</sup>Liver Cancer Prevention Research Unit,  
10     RIKEN Center for Integrative Medical Sciences (IMS), Wako, Japan, <sup>e</sup>Laboratoire de Virologie  
11     Moléculaire, Institut National de la Transfusion Sanguine, INSERM U1134, Paris, France,  
12     <sup>f</sup>Department of Applied Biological Sciences, Tokyo University of Science, Noda, Japan, <sup>g</sup>CREST,  
13     JST, Saitama, Japan

14  
15     **Running title:** Coevolution between mammalian hepadnaviruses and NTCP

16  
17     #Address correspondence to

18     Koichi Watashi, Ph.D.

19     Department of Virology II, National Institute of Infectious Diseases

20     1-23-1 Toyama, Shinjuku-ku, Tokyo 162-8640, Japan.   E-mail: kwatashi@nih.go.jp

21

22     **Keywords:** HBV, NTCP, coevolution, positive selection, dN/dS,

23

24 **Abstract**

25           Hepatitis B virus (HBV) and its hepadnavirus relatives infect a wide range of vertebrates from  
26 fish to human. Hepadnaviruses and their hosts have a long history of acquiring adaptive mutations.  
27 However, there are no reports providing direct molecular evidence for such a coevolutionary “arms  
28 race” between hepadnaviruses and their hosts. Here, we present evidence suggesting the adaptive  
29 evolution of the sodium taurocholate cotransporting polypeptide (NTCP), an HBV receptor, has been  
30 influenced by virus infection. Evolutionary analysis of the NTCP-encoding genes from 20 mammals  
31 showed that most NTCP residues are highly conserved among species, exhibiting evolution under  
32 negative selection ( $dN/dS < 1$ ); this observation implies that the evolution of NTCP is restricted by  
33 maintaining its original protein function. However, 0.7 % of NTCP amino acid (aa) residues exhibit  
34 rapid evolution under positive selection ( $dN/dS > 1$ ). Notably, a substitution at aa 158, a positively  
35 selected residue, converting the human NTCP to a monkey-type sequence abrogated the capacity to  
36 support HBV infection; conversely, a substitution at this residue converting the monkey Ntcp to the  
37 human sequence was sufficient to confer HBV susceptibility. Together, these observations suggested  
38 that positive selection at aa 158 was induced by virus infection. Moreover, the aa 158 sequence  
39 determined attachment of the HBV envelope protein to host cell, demonstrating the mechanism  
40 whereby HBV infection would create positive selection at this residue in NTCP. In summary, we  
41 provide the first evidence in agreement with the function of hepadnavirus as a driver for inducing an  
42 adaptive mutation in host receptor.

43 **Importance**

44           Hepatitis B virus (HBV) and its hepadnavirus relatives infect a wide range of vertebrates, with  
45 a long infectious history (hundreds of millions of years). Such a long history generally allows adaptive  
46 mutations in hosts to escape from infection, while simultaneously allowing adaptive mutations in  
47 viruses to overcome host barriers. However, there is no published molecular evidence for such a  
48 coevolutionary “arms race” between hepadnaviruses and hosts. In the present study, we performed  
49 coevolutionary phylogenetic analysis between hepadnaviruses and the sodium taurocholate  
50 cotransporting polypeptide (NTCP), an HBV receptor, combined with virological experimental assays  
51 for investigating the biological significance of NTCP sequence variation. Our data provide the first  
52 molecular evidences supporting that HBV-related hepadnaviruses drive adaptive evolution in the  
53 NTCP sequence, including a mechanistic explanation of how NTCP mutations determine host viral  
54 susceptibility. Our novel insights enhance our understanding of how hepadnaviruses evolved with  
55 their hosts, permitting the acquisition of strong species-specificity.

56

57

## 58 **Introduction**

59 Over 250 million people are chronically infected worldwide with hepatitis B virus (HBV), and  
60 hepatitis B resulted in 887,000 deaths in 2015 (1). HBV and its hepadnavirus relatives infect a wide  
61 range of vertebrates, including fish, amphibians, reptiles, birds, and mammals (2-10). Phylogenetic  
62 analyses suggest that the coevolutionary history of hepadnaviruses and their hosts spans hundreds of  
63 millions of years (2, 6, 7, 9). During the long-term coevolution of virus and host, host proteins that  
64 interact directly with a virus accumulate adaptive mutations to permit escape from virus infection,  
65 while viruses acquire mutations that overcome host barriers (11). In the course of this coevolutionary  
66 “arms race”, viruses continuously exert selective pressures on their host, thereby inducing multiple  
67 adaptive mutations in the host genome (12). One of the best-known examples of such coevolution is  
68 embodied by the conflict between (host-encoded) restriction factors and their (virus-encoded) viral  
69 antagonists (11). Host restriction factors inhibit viral replication at different steps during virus  
70 proliferation in the host. Conversely, viruses encode factors that antagonize the function of host  
71 restriction factors and thereby circumvent the host’s attempt to eliminate viruses (13). During the  
72 course of long-term viral selective pressures, some host restriction factors evolve rapidly, a process  
73 that is evidenced as a ratio of nonsynonymous to synonymous mutations in the host gene (the dN/dS  
74 ratio) that exceeds 1 (“positive selection”) (14). For example, host restriction factors against human  
75 immunodeficiency virus type 1 (HIV-1), including tripartite motif-containing protein 5-alpha  
76 (TRIM5 $\alpha$ ) (15), apolipoprotein B mRNA editing enzyme catalytic polypeptide-like 3G (APOBEC3G)  
77 (16), bone marrow stromal antigen 2 (BST2, also known as tetherin, CD317, and HM1.24) (17-20),  
78 and SAM domain and HD domain 1 (SAMHD1) (21, 22), have been reported to exhibit rapid evolution  
79 (dN/dS > 1), likely due to the selective pressure exerted by HIV-1 infection. Regarding the coevolution  
80 of hepadnaviruses and host restriction factors, Abdul *et al.* recently reported an evolutionary analysis  
81 of an HBV restriction factor, the Structural Maintenance of Chromosomes (Smc) 5/6 complex (23), a

82 complex originally identified based on its housekeeping function in genomic stability (24). However,  
83 Abdul *et al.* did not detect a clear signature of positive selection that was suggested to be induced by  
84 hepadnavirus infection. In contrast, Enard *et al.* reported that host proteins interacting with viruses  
85 with a long history display higher rates of adaptive mutations (12); those authors showed that host  
86 proteins reported to interact with HBV exhibited a strong signature of adaptation during a coevolution  
87 with viruses, which was in a similar degree to that seen for HIV-1-interacting host proteins. However,  
88 molecules subject to such a selective pressure by hepadnaviruses have not (to our knowledge) been  
89 identified to date.

90 Hepadnaviruses infect their hosts in a highly species-specific manner; for instance HBV can  
91 infect only humans, chimpanzees, and treeshrews, but not monkeys, including both Old-World and  
92 New-World monkeys (25). The sodium taurocholate cotransporting polypeptide [NTCP, also  
93 designated as solute carrier family 10A1 (SLC10A1)] was recently identified as a host factor that  
94 functions as an HBV entry receptor; NTCP, which originally was characterized as a hepatic transporter  
95 for the uptake of bile acids by hepatocytes, binds to the HBV envelope protein, notably to the preS1  
96 region, thereby mediating viral entry into the host (26). NTCP has been suggested to be a key  
97 determinant of the species-specificity of HBV, as primary monkey hepatocytes can support the  
98 replication of intracellular HBV but not the entry of the virus into host cells (27), and complementation  
99 the monkey cells with human NTCP (hNTCP) permits HBV entry and thereby the whole infection  
100 cycle both in cell culture and *in vivo* (28, 29). These results indicate that the inability of monkey Ntcp  
101 to support HBV infection serves as the species barrier preventing HBV infection in monkey. However,  
102 the evolutionary relationship between NTCP sequences in different species and susceptibility to  
103 hepadnavirus infection has not been analyzed previously. Virus entry receptors generally have their  
104 own original function in cellular physiology. Thus their sequences typically are conserved during  
105 evolution to maintain their functional profile, showing a  $dN/dS < 1$  that indicates negative selection

106 (30). Indeed, transferrin receptor (TfR1), which serves as an entry receptor for arenaviruses and mouse  
107 mammary tumor virus (31), exhibit such evolutionary negative selection across their entire sequences.  
108 Interestingly, however, a small percentage of positions in the TfR1 coding sequence is rapidly evolving  
109 under positive selection, and these sites were shown to correspond to a virus-binding surface (31). In  
110 another example, the Niemann-Pick disease, type C1 (NPC1), a receptor for filovirus, shows a similar  
111 evolutionary property (32). These data strongly suggest that virus infection serve as a pressure for the  
112 evolution of viral entry receptors. In addition, positive selection sites on virus entry receptors can  
113 provide critical information, permitting the identification of the receptor domains that interface with  
114 the virus. However, to our knowledge, there have been no reports of such an evolutionary analysis for  
115 a hepadnavirus receptor.

116 In this study, we focused on the phylogenetic analyses of hepadnaviruses and NTCP based on  
117 molecular evolutionary analyses to detect positive selection sites, and investigated the biological  
118 significance of NTCP sequence changes using virological experimental assays in our cell culture model  
119 (33). Evolutionary analyses of the NTCPs from 20 mammalian species revealed that NTCP was highly  
120 conserved among these mammals, but interestingly identified several sites that were subject to positive  
121 selection. Among these positive selection sites, the amino acid (aa) at NTCP residue 158 determined  
122 the HBV host species-specificity: Our virological experiments showed that a single substitution  
123 converting aa 158 of human NTCP to the corresponding aa of cynomolgus macaque Ntcp completely  
124 negated the protein's ability to mediate viral infection, whereas a cynomolgus macaque Ntcp protein  
125 mutated to carry the hNTCP aa 158 rendered macaque Ntcp susceptible to the virus, suggesting that  
126 this site regulates viral susceptibility. Moreover, aa 158 of NTCP was shown to mediate viral  
127 attachment to the host cell surface. In a manner analogous to TfR1 and NPC1, these data suggest that  
128 NTCP receives an evolutionary pressure by virus infection, which provides the first evidence in a  
129 molecular level for coevolution between hepadnaviruses and hosts.

## 130 **Results**

131           **A small portion of sites in *NTCP* evolves under positive selection in mammals.** We  
132 performed maximum likelihood-based molecular evolutionary analyses (Figure 1) using 20 *NTCP*  
133 coding sequences from mammalian species, including human, monkeys, bats, rabbit, rat, and mouse  
134 (Table 1). To detect positive selection sites in mammalian *NTCP*s, two pairs of site-models were  
135 conducted using PAML ver. 4.8 (34, 35). The differences between neutral models and selection models  
136 (M1a vs. M2a, respectively or M7 vs. M8, respectively) were significant ( $p < 0.01$  or  $p < 0.005$ ,  
137 respectively), suggesting that *NTCP* genes have been evolving under positive selection in mammals  
138 (Table 2). The M2a analysis estimated that 66.2 % ( $p0 = 0.662$ ) of the codons were under negative  
139 selection with dN/dS ratio ( $\omega0$ ) = 0.086; 33.1 % ( $p1 = 0.331$ ) were under neutral evolution; and 0.7 %  
140 ( $p2 = 0.007$ ) were under positive selection with dN/dS ratio ( $\omega2$ ) = 4.526. Thus, only a small number  
141 of sites in mammalian *NTCP*s was under positive selection. The same data set also was analyzed to  
142 detect positive selection sites by Fixed Effects Likelihood (FEL), Random effects likelihood (REL)  
143 (36), and Mixed Effects Model of Evolution (MEME) (37), and 27 positively selected sites were  
144 inferred by at least one of the three evolutionary analyses as summarized in Table 3.

145

146           **Single positive selection site of *NTCP* is a key determinant of HBV susceptibility.** To date,  
147 hepadnaviruses have been found in multiple Hominoids, including chimpanzees and orangutans (38).  
148 On the other hand, no HBV or hepadnavirus infections have been reported in Old-World monkeys,  
149 even though this family is the closest to the Hominoids (Figure 1) [Although a unique case of HBV  
150 genotype D infection was reported in *Macaca fascicularis* (cynomolgus macaques) from Mauritius  
151 (39), another recent paper showed that this macaques exhibited no evidence of current or prior HBV  
152 infection (29)]. Since Old-World monkeys are the closest species to human that are regarded to be

153 non-susceptible to HBV or hepadnaviruses, we focused on these two lineages for the comparison  
154 among *NTCP* genes. Notably, there are 13 aa differences between the human NTCP (NM\_003049.3,  
155 hNTCP) and the cynomolgus macaque Ntcp (NM\_001283323.1, *Macaca fascicularis*, Old-World  
156 monkey, mNtcp). Evolutionary analysis comparing the corresponding gene sequences identified five  
157 sites (codons 142, 157, 158, 160, and 165) in the *NTCP* open reading frame (ORF) that are under  
158 positive selection (Table 3 and Figure 2).

159 We next addressed whether the amino acids encoded by these sites are involved in susceptibility  
160 to HBV infection. We prepared HepG2 cells transiently expressing hNTCP or a series of single-mutant  
161 variants in which a single amino acid was replaced by the corresponding macaque residue (S142T,  
162 K157G, G158R, V160I, and L165P) (Figure 3A). Similarly, we produced HepG2 cells expressing a  
163 variant of hNTCP in which aa 157-165 were replaced by the corresponding macaque sequence  
164 [designated hNTCP(m157-165)]; this substitution has been reported to abrogate NTCP's receptor  
165 function (26) (Figure 3A). At 24 h after transfection, protein expression of NTCP or its variants was  
166 confirmed by immunoblotting of cell lysates. As shown in Figure 3A, the mutant hNTCPs were  
167 expressed at levels equivalent to that of wild-type hNTCP, except for hNTCP-L165P, which had much  
168 lower protein expression (Figure 3A). To further validate whether each of the NTCP variants  
169 maintained its functional properties as a bile acid transporter, we also measured NTCP-mediated uptake  
170 of [<sup>3</sup>H]-taurocholic acid in these cells. All NTCP variants, including hNTCP-L165P, possessed the  
171 capacity to uptake bile acid, retaining at least 40 % of the wild-type activity and providing activity 6-  
172 to 24-fold that of background (assessed under sodium-free conditions) (Figure 3B). Thus, all of the  
173 hNTCP variant-expressing HepG2 cell lines in this experiment retained NTCP functions.

174 We then analyzed the ability of these cell lines to support HBV infection. Specifically, an HBV  
175 infection assay was performed (per Materials and Methods) (33) to evaluate the cells' susceptibility to  
176 HBV infection by detecting intracellular hepatitis B core antigen (HBcAg) at 13 days post-inoculation



177 by immunofluorescence analysis (Figure 4A, right pictures, red, “DMSO”). The detected levels of  
178 HBcAg were normalized to the expression level of NTCP in the respective line, permitting assessment  
179 of each NTCP’s ability to support HBV infection (Figure 4A, center graph). In addition, to confirm  
180 that the observed fluorescence signals were derived from HBV infection (and did not reflect non-  
181 specific background), the HBV infection assay was also performed in parallel in the presence of  
182 Myrcludex B (Myr-B), an HBV entry inhibitor (40), a condition that should abrogate the specific signal  
183 derived from HBV infection (Figure 4A, right pictures, “Myr-B”). As shown in Figure 4A, HBV  
184 infection was observed in the lines expressing wild-type hNTCP, but not in that expressing  
185 hNTCP(m157-165) (Figure 4A, lanes 2 and 9), consistent with a previous report (26). HBV infection  
186 was supported by all but one of the NTCP variants, hNTCP(S142T), hNTCP(K157G), hNTCP(V160I),  
187 hNTCP(I161L), and hNTCP(L165P) (Figure 4A, lanes 3, 4, 6, 7, and 8). In contrast, the level of HBV  
188 infection in hNTCP(G158R)-expressing cells was similar to the background level (Figure 4A, lanes 1  
189 and 5), suggesting that the aa 158 was unique among the examined sites in determining HBV  
190 susceptibility.

191 We then performed a complementary experiment using the mNtcp backbone and substituting  
192 single amino acids with the human residues for the corresponding sites; the resulting mutant mNtcps  
193 were examined to determine whether any of the aa substitutions endowed cells with viral entry. Using  
194 the same methods as those used in Figure 3A and B, we confirmed the protein expression as well as  
195 the transporter activity of the wild-type and mutant mNtcps. Notably, all of the mNtcp derivatives  
196 were expressed in HepG2 cells and provided functional bile acid uptake (to levels at least 50 % that of  
197 the wild type, with activity 7- to 13-fold higher than the background level) (Figure 3C and D). The  
198 HBV infection assay indicated that the wild-type mNtcp did not support HBV infection (Figure 4B,  
199 lane 11), while the substitution of the human aa 157-165 in mNtcp [mNtcp(h157-165)] permitted  
200 infection (Figure 4B, lane 18), as previously reported (26). Among the single-aa changes, only the

201 substitution to the human sequence at aa 158 (R158G) was sufficient to endow mNtcp with HBV  
202 receptor function equivalent to that of mNtcp(h157-165) (Figure 4B, lane 14). Thus, a single positive  
203 selection site in *NTCP*, corresponding to aa158, was a key determinant for HBV susceptibility.

204

205 **The positive selection site of NTCP is critical for HBV attachment.** NTCP is involved in  
206 the specific attachment of HBV to the host cell surface through binding to the preS1 region of the large  
207 surface protein (LHB) of HBV (41). To explore the impact of the NTCP substitutions on the interaction  
208 with HBV preS1, we examined the attachment of a fluorescence-labeled preS1 peptide (preS1-  
209 TAMRA) to target cells expressing the wild-type NTCP or its variants (Figure 5A and B, right pictures,  
210 red, “DMSO”). To confirm the specificity of the observed preS1-TAMRA signals, the preS1 binding  
211 assay was (as above) performed in parallel in the presence of Myr-B, an attachment inhibitor (40)  
212 (Figure 5A and B, right pictures, “Myr-B”). Expression in HepG2 cells of variants based on hNTCP  
213 or mNtcp backbones was confirmed by immunofluorescence analysis (Figure 5A and B, right pictures,  
214 green). As shown in Figure 5A, while expression of hNTCP supported preS1 attachment, replacement  
215 of aa 158 in hNTCP with the macaque-type residue [hNTCP(G158R)] completely abrogated the ability  
216 to bind to the preS1 peptide (Figure 5A, lane 5). On the other hand, replacement of aa 158 in mNtcp  
217 with the human residue [mNtcp(R158G)] endowed mNtcp with preS1 binding activity (Figure 5B, lane  
218 14). Notably, although the preS1 binding activity of mNtcp(R158G) was still approximately 40% that  
219 of mNtcp(h157-165), this activity was significantly higher than that of wild-type mNtcp (Figure 5B,  
220 lane 11), and this result correlated well with the profile of the HBV infection (Figure 4).

221 Hepatitis D virus (HDV) virions harbor an envelope identical or very similar to that of HBV  
222 particles, entering cells in a manner similar to that employed by HBV (42). Consistent with the above  
223 results obtained in the HBV infection and preS1-binding assays, HDV susceptibility in hNTCP-

224 expressing cells was abrogated by the G158R substitution in hNTCP (Figure 6A, lane 5), whereas the  
225 R158G substitution in mNtcp endowed cells with susceptibility to HDV infection (Figure 6B, lane 14).  
226 Taken together, these observations suggested that a single position on NTCP, at aa 158, determined  
227 the susceptibility to HBV/HDV infection by facilitating viral attachment.

228

229

## 230 **Discussion**

231 Our evolutionary analyses revealed that *NTCP* is highly conserved in mammals (across 66.2 %  
232 of the codons), indicating that NTCP is critical for (or advantageous to) host viability. This is in  
233 agreement with a previous report showing that *NTCP*-knockout mice could exhibit body weight loss  
234 and elevate serum bile acid levels (43). While the majority of *NTCP* sequence was subjected to  
235 negative selection, several positive selection sites were inferred. This observation is consistent with  
236 analyses of two other virus receptors, Tfr1 and NPC1, which showed overall negative selection with  
237 a subset of positive selection sites corresponding to the virus-binding domain (31, 32). To verify the  
238 biological significance of the positive selection sites in NTCP, we focused on a comparison of the  
239 protein between human and the Old-World monkey lineage. Notably, the latter family is  
240 phylogenetically the closest to human but Old-World monkeys are not susceptible to HBV infection  
241 (38), rendering these simians as the best counterpart for comparison. Interestingly, our infection  
242 experiments suggested that a single positively selected site inferred in the present study, aa 158, is a  
243 key determinant of HBV's host species-specificity. The consistent role of aa 158 has been just reported  
244 by a very recent paper (44). This observation is supported by the fact that NTCPs that carry the human-  
245 type sequence at aa 158 (e.g., NTCP of chimpanzee, orangutan, New-World monkey, treeshrew, and  
246 mouse, Figure 1) is known to interact with HBV preS1 (28, 44-46) (although these species except for

247 chimpanzee and treeshrew are not susceptible to HBV infection because of yet unknown restriction  
248 mechanism in post-entry steps (44, 46)). Given that the crystal structure of NTCP has not been solved,  
249 the exact mechanism whereby aa 158 facilitates HBV entry remains unknown. However, our data  
250 suggest that this residue is a primary mediator of the interaction between the preS1 region of the HBV  
251 envelope protein and the cell surface (Figure 5). This inference would be analogous to the analysis of  
252 TfR1 and NPC1, of which positively selected sites have been suggested to be the interface of virus  
253 binding, as a signature of coevolutionary relationship with virus infection (31, 32).

254 To date, most of the relevant studies have reported that error-prone RNA viruses and lethal  
255 viruses (e.g., HIV and filovirus) exert selective pressure on their host proteins (15-22, 32). On the  
256 other hand, if a virus is not pathogenic to the host, adaptive mutations in host proteins would not be  
257 expected to occur (11). In most cases, HBV infection to adult human is controlled by immunity; only  
258 in a minority of cases does chronic infection occur for developing chronic liver disease, and a limited  
259 cases develop fulminant hepatitis (47). Therefore, it has been unclear whether HBV could serve as a  
260 driver of adaptive evolution in host proteins. However, hepadnavirus infection in malnourished  
261 wildlife species, which can be immunocompromised, may results in higher morbidity and mortality  
262 (48). In addition, an analysis by Enard *et al.* of the evolutionary patterns of ~9,900 proteins conserved  
263 in mammalian genomes revealed that host proteins that have been in contact with viruses for extended  
264 evolutionary periods in a wide range of lineages display higher rates of adaptation to viruses; among  
265 these proteins, those that interact with HBV proteins had the strongest signature of adaptation,  
266 suggesting the coevolution of host factors and hepadnaviruses (12). However, Enard *et al.* did not  
267 provide a molecular analysis showing the detailed gene sites that were under positive selection by virus  
268 infection. Therefore, the present study provides the first clear evidence for positive selection (in  
269 NTCP) mediated by hepadnaviruses. We hypothesize that the predecessors of Old-World monkeys  
270 may have been infected with pathogenic hepadnaviruses that imposed strong selective pressures; while

271 these ancient Old-World monkeys declined or became extinct, their descendants (the extant Old-World  
272 monkeys) presumably evolved to escape hepadnavirus infection by accruing a mutation at NTCP aa  
273 158. Indeed, examples of endangerment or extinction of species caused by virulent virus infection  
274 have been reported (49-51). Further investigation is needed to determine whether any hepadnavirus  
275 exists in extant Old-World monkeys, because the number of primate species surveyed for  
276 hepadnaviruses infection has been still limited (38). However, all known Old-World monkey NTCPs  
277 carry 158R (i.e., HBV-unsusceptible NTCP) (44), consistent with the apparent absence of  
278 hepadnavirus in Old-world monkeys. Simian immunodeficiency virus (SIV) is nonpathogenic in its  
279 “natural” hosts, while its virus relatives are highly pathogenic to rhesus macaque, who is an  
280 experimental host, and human, who only recently have become hosts (52, 53). These observations  
281 support the idea that a virus recently acquired from different species possesses high pathogenic  
282 properties and may impose selective genetic pressure on the new host; subsequent host adaptation over  
283 the course of a long history of infection would render such a virus less pathogenic to the new host (54).  
284 Interestingly, hepadnaviruses have an extremely long history of infection of their respective hosts. The  
285 present study demonstrates that the host species-specificity of a virus can be determined by a single  
286 positively selected site in a host receptor, as evidenced by a comparison of HBV susceptibility between  
287 human and Old-World monkeys and correlation with the sequence of the *NTCP* gene. Although there  
288 is a possibility that viruses or factors other than hepadnavirus also exerted selective pressure on NTCP,  
289 we provide the first evidence that at least hepadnaviruses can be a driver for inducing adaptive  
290 mutations in NTCP.

291 Surprisingly, our study implies that the HBV cross species barrier is secured by a single amino  
292 acid change in the virus receptor. Several studies have reported that a single mutation on a virus  
293 envelope protein determines species-specificity (55, 56), but our insight is unique in showing that a  
294 single mutation in a host receptor plays a key role in determining the host specificity. It is not known

295 whether all hepadnaviruses (or which hepadnaviruses) use NTCP as their entry receptor. However,  
296 tent-making bat hepadnavirus (3) and New-World monkey hepadnaviruses (44) are reported to interact  
297 with NTCP, suggesting that NTCP functions as a receptor for a wide range of hepadnaviruses (at least,  
298 from bat to human). The present analysis suggests that HBV-related hepadnaviruses drive an adaptive  
299 evolution in their hosts' proteins. Our novel insights are expected to improve our understanding of  
300 how hepadnaviruses co-evolved with their hosts over evolutionary intervals, thereby gaining strong  
301 host species-specificity.

302

303

## 304 **Materials & Methods**

305           **Molecular evolutionary analyses.** Twenty mammalian full-length NTCP protein sequences  
306 were collected from GenBank as listed in Table 1 and aligned by using MUSCLE implemented in  
307 MEGA7 (57). The resulting alignment was verified manually at the amino acid level. Then, a  
308 Maximum Likelihood (ML) tree of the 20 NTCP sequences was reconstructed using PhyML 3.0 (58)  
309 with 1,000 bootstrap resamplings, and used for further analysis (Figure 1). The best fitting substitution  
310 model was determined using Smart Model Selection (SMS) (59) implemented in PhyML 3.0. The  
311 Akaike Information Criterion (AIC) selected TN93 + G as the best-fit model. To test positive selection  
312 or the presence of sites with  $\omega$  (dN/dS) > 1 in the evolution of NTCP, we performed two pairs of site-  
313 models with CODEML implemented in the PAML v 4.8 (34, 35): the first pair involves employed M1a  
314 (neutral, 2 site classes,  $\omega > 1$  not allowed) versus M2a (selection, 3 site classes,  $\omega > 1$  allowed), and  
315 the second pair consisted of M7 (neutral, 10 site classes,  $\omega > 1$  not allowed) versus M8 (selection, 11  
316 site classes,  $\omega > 1$  allowed). FEL, REL (36), and MEME (37) also were employed to detect positive  
317 selection sites through the DATAMONKEY webserver (60). HKY85 was determined as the best-  
318 fitting substitution model based on the model selection tool in DATAMONKEY. The following  
319 default significant cut-off values were used: p-value < 0.1 for FEL, Bayes factor > 50 for REL, and p-  
320 value < 0.1 for MEME.

321           **Plasmids and cells.** Plasmids were constructed to permit expression of human NTCP (hNTCP)  
322 or macaque Ntcp (*Macaca fascicularis*, mNtcp) tagged with Myc/His at the C-terminus. Specifically,  
323 the open reading frame encoding either hNTCP (NM\_003049.3) or mNtcp (NM\_001283323.1) was  
324 inserted between the KpnI and XbaI sites of pEF4-Myc/His A vector (Thermo Fisher Scientific,  
325 Waltham, MA). Individual mutant constructs were constructed using oligonucleotide-directed  
326 mutagenesis (61).

327 HepG2 cells were cultured as described previously (33). To generate NTCP-expressing cells,  
328 HepG2 cells were transfected with each NTCP expression plasmid using Lipofectamine 3000 (Thermo  
329 Fisher Scientific) according to the manufacturer's protocol. At 24 h post-transfection, the cells were  
330 trypsinized and transferred into 96-well plates; the replated cells then were subjected to preS1 binding  
331 assay or virus infection assay (performed as described below) at 48 h post-transfection.

332 **Western blotting.** Cells were treated first with lysing buffer (1 % NP-40, 150 mM NaCl, 50  
333 mM Tris-HCl pH7.5) and then with 250 U Peptide-N-Glycosidase F (PNGase F) to digest N-linked  
334 oligosaccharides from glycoproteins. NTCP expression was examined by immunoblotting using  
335 monoclonal anti-c-Myc antibody (Santa Cruz Biotechnology, Dallas, TX) at a 1:3,000 dilution, as  
336 described previously (55). Beta-actin was detected as a loading control by using monoclonal anti- $\beta$ -  
337 actin antibody (SIGMA, St. Louis, MO) at a 1:10,000 dilution. The chemiluminescence signals were  
338 scanned with C-DiGit (LI-COR Biosciences, Lincoln, NE) and analyzed with Image Studio Lite, ver.  
339 5.2 (LI-COR Biosciences).

340 **NTCP transporter assay.** NTCP transporter activity was measured by incubating cells with  
341 [ $^3$ H]-taurocholic acid at 37°C for 15 min in a sodium-containing buffer to allow substrate uptake into  
342 the cells. After washing to remove free [ $^3$ H]-taurocholic acid, cells were lysed and intracellular  
343 radioactivity was measured using a LSC-6100 liquid scintillation counter (Hitachi-Aloka Medical,  
344 Tokyo, Japan) as described previously (61). To measure the background signal, the same assay was  
345 performed in a sodium-free buffer, in which the NTCP transporter does not function. To evaluate the  
346 transporter activity of equivalent amounts of NTCP protein (normalized NTCP transporter activity),  
347 we divided the value for bile acid uptake by the level of NTCP expression determined by  
348 immunofluorescence analysis. Results are presented as mean  $\pm$  SEM (n=3).



349           **HBV preparation and infection.** HBV inocula were derived from the culture supernatant of  
350 Hep38.7-Tet cells (genotype D); these inocula were prepared as described previously (62). For the  
351 HBV infection assay, HBV was infected into recipient cells at 12,000 genome equivalents (GEq)/cell  
352 in the presence of 4 % polyethyleneglycol (PEG) 8000 for 16 h, followed by washing (to remove free  
353 virus) and culturing the cells for an additional 12 days, according to the previously described protocol  
354 (63). Indirect immunofluorescence analysis for detection of HBc was conducted to evaluate HBV  
355 infection; this technique was performed essentially as described previously (64). Briefly, after fixation  
356 with 4% paraformaldehyde and permeabilization with 0.3% Triton X-100, the cells were treated with  
357 a polyclonal rabbit anti-HBV core antibody (Thermo Fisher Scientific) at a 1:100 dilution, and then  
358 with an Alexa Fluor 594 (Thermo Fisher Scientific) -conjugated donkey anti-rabbit IgG secondary  
359 antibody at a 1:500 dilution. Stained cells were photographed using a BZ-X710 microscope (Keyence,  
360 Osaka, Japan), and the images were analyzed with BZ-X Analyzer 1.3.1.1 (Keyence). The relative  
361 number of HBV-infected cells was determined by counting HBc-positive cells using the Hybrid Cell  
362 Count module of the Keyence analyzer, and the values were normalized for the NTCP expression levels  
363 determined by immunofluorescence analyses.

364           **preS1 binding assay.** To examine binding between the preS1 region in the large surface  
365 protein of HBV (LHBs) and host cells, cells were exposed to 20 nM 6-carboxytetramethylrhodamine-  
366 labeled preS1 peptide (TAMRA-preS1) at 37 °C for 30 min; unbound peptide then was removed by  
367 washing. To simultaneously detect Myc/His-tagged NTCP, the cells were fixed with 4 %  
368 paraformaldehyde and permeabilized with 0.3% Triton X-100, and the tagged NTCP was detected with  
369 a monoclonal anti-c-Myc antibody at a 1:1,200 dilution and with an Alexa Fluor 488-conjugated goat  
370 anti-mouse IgG secondary antibody (Thermo Fisher Scientific) at a 1:1,000 dilution; nuclei were  
371 stained with 4',6-diamidino-2-phenylindole (DAPI) at a 1:5,000 dilution. Fluorescence was quantified  
372 as described above.

373           **HDV preparation and infection.** HDV was prepared from culture supernatants of Huh-7 cells  
374 transfected with pSVLD3 (kindly provided by Dr. John Taylor at the Fox Chase Cancer Center) and  
375 pT7HB2.7 as described previously (65, 66). The cells were inoculated with HDV at 15 GEq/cell in  
376 5 % PEG 8000 for 16 h, followed by washing (to remove free virus) and culturing of the cells for an  
377 additional 6 days. Total intracellular RNA was extracted and reverse transcribed using a TaqMan Gene  
378 Expression Cells-to-Ct kit (Thermo Fisher Scientific) according to the manufacturer's protocol.  
379 Intracellular HDV RNA was quantified by real-time reverse transcription PCR (RT-PCR) as described  
380 previously (67). Results are presented as mean  $\pm$  SEM (n=3).

381

382

### 383 **Acknowledgments**

384           HDV expression plasmids were kindly provided by Dr. John Taylor at the Fox Chase Cancer  
385 Center. This study was supported by the Japan Society for the Promotion of Science (JSPS) Research  
386 Fellow Grant (JP16J40232); KAKENHI (JP17H04085, JP66KT0111, JP17K15708); the JST CREST  
387 program; the Japan Agency for Medical Research and Development, AMED (JP18fk0310114j0002,  
388 JP18fk0310101j1002, JP18fk0310103j0002, JP18fk0310103j0202, JP18fm0208019j0002,  
389 JP18fk0210036j0001, and JP18fk0210009j0003); the Takeda Science Foundation; and the  
390 Pharmacological Research Foundation, Tokyo.

391

392

393

394 **Conflict of Interest**

395 No interests

396

397

398

399

400

401 **References**

- 402 1. World Health Organization. 2017. Global Hepatitis Report, 2017.  
403 <http://www.who.int/hepatitis/publications/global-hepatitis-report2017/en/>. Accessed
- 404 2. Dill JA, Camus AC, Leary JH, Di Giallonardo F, Holmes EC, Ng TF. 2016. Distinct Viral  
405 Lineages from Fish and Amphibians Reveal the Complex Evolutionary History of  
406 Hepadnaviruses. *J Virol* 90:7920-33.
- 407 3. Drexler JF, Geipel A, König A, Corman VM, van Riel D, Leijten LM, Bremer CM, Rasche  
408 A, Cottontail VM, Maganga GD, Schlegel M, Müller MA, Adam A, Klose SM, Carneiro AJ,  
409 Stocker A, Franke CR, Gloza-Rausch F, Geyer J, Annan A, Adu-Sarkodie Y, Oppong S,  
410 Binger T, Vallo P, Tschapka M, Ulrich RG, Gerlich WH, Leroy E, Kuiken T, Glebe D,  
411 Drosten C. 2013. Bats carry pathogenic hepadnaviruses antigenically related to hepatitis B  
412 virus and capable of infecting human hepatocytes. *Proc Natl Acad Sci U S A* 110:16151-6.
- 413 4. Hahn CM, Iwanowicz LR, Corman RS, Conway CM, Winton JR, Blazer VS. 2015.  
414 Characterization of a Novel Hepadnavirus in the White Sucker (*Catostomus commersonii*)  
415 from the Great Lakes Region of the United States. *J Virol* 89:11801-11.
- 416 5. Mason WS, Seal G, Summers J. 1980. Virus of Pekin ducks with structural and biological  
417 relatedness to human hepatitis B virus. *J Virol* 36:829-36.
- 418 6. Suh A, Brosius J, Schmitz J, Kriegs JO. 2013. The genome of a Mesozoic paleovirus reveals  
419 the evolution of hepatitis B viruses. *Nat Commun* 4:1791.
- 420 7. Suh A, Weber CC, Kehlmaier C, Braun EL, Green RE, Fritz U, Ray DA, Ellegren H. 2014.  
421 Early mesozoic coexistence of amniotes and hepadnaviridae. *PLoS Genet* 10:e1004559.
- 422 8. Summers J, Smolec JM, Snyder R. 1978. A virus similar to human hepatitis B virus  
423 associated with hepatitis and hepatoma in woodchucks. *Proc Natl Acad Sci U S A* 75:4533-7.
- 424 9. Lauber C, Seitz S, Mattei S, Suh A, Beck J, Herstein J, Borold J, Salzburger W, Kaderali L,  
425 Briggs JAG, Bartenschlager R. 2017. Deciphering the Origin and Evolution of Hepatitis B  
426 Viruses by Means of a Family of Non-enveloped Fish Viruses. *Cell Host Microbe* 22:387-399  
427 e6.
- 428 10. de Carvalho Dominguez Souza BF, König A, Rasche A, de Oliveira Carneiro I, Stephan N,  
429 Corman VM, Roppert PL, Goldmann N, Kepper R, Müller SF, Volker C, de Souza AJS,  
430 Gomes-Gouvea MS, Moreira-Soto A, Stocker A, Nassal M, Franke CR, Rebello Pinho JR,  
431 Soares M, Geyer J, Lemey P, Drosten C, Netto EM, Glebe D, Drexler JF. 2018. A novel  
432 hepatitis B virus species discovered in capuchin monkeys sheds new light on the evolution of  
433 primate hepadnaviruses. *J Hepatol* 68:1114-1122.
- 434 11. Duggal NK, Emerman M. 2012. Evolutionary conflicts between viruses and restriction factors  
435 shape immunity. *Nat Rev Immunol* 12:687-95.
- 436 12. Enard D, Cai L, Gwennap C, Petrov DA. 2016. Viruses are a dominant driver of protein  
437 adaptation in mammals. *Elife* 5.
- 438 13. Kluge SF, Sauter D, Kirchhoff F. 2015. SnapShot: antiviral restriction factors. *Cell* 163:774-  
439 774 e1.
- 440 14. Yang Z. 2014. Molecular evolution: a statistical approach. Oxford University Press.

- 441 15. Sawyer SL, Wu LI, Emerman M, Malik HS. 2005. Positive selection of primate TRIM5alpha  
442 identifies a critical species-specific retroviral restriction domain. *Proc Natl Acad Sci U S A*  
443 102:2832-7.
- 444 16. Sawyer SL, Emerman M, Malik HS. 2004. Ancient adaptive evolution of the primate antiviral  
445 DNA-editing enzyme APOBEC3G. *PLoS Biol* 2:E275.
- 446 17. Gupta RK, Hue S, Schaller T, Verschoor E, Pillay D, Towers GJ. 2009. Mutation of a single  
447 residue renders human tetherin resistant to HIV-1 Vpu-mediated depletion. *PLoS Pathog*  
448 5:e1000443.
- 449 18. Kobayashi T, Takeuchi JS, Ren F, Matsuda K, Sato K, Kimura Y, Misawa N, Yoshikawa R,  
450 Nakano Y, Yamada E, Tanaka H, Hirsch VM, Koyanagi Y. 2014. Characterization of red-  
451 capped mangabey tetherin: implication for the co-evolution of primates and their lentiviruses.  
452 *Sci Rep* 4:5529.
- 453 19. McNatt MW, Zang T, Hatzioannou T, Bartlett M, Fofana IB, Johnson WE, Neil SJ, Bieniasz  
454 PD. 2009. Species-specific activity of HIV-1 Vpu and positive selection of tetherin  
455 transmembrane domain variants. *PLoS Pathog* 5:e1000300.
- 456 20. Takeuchi JS, Ren F, Yoshikawa R, Yamada E, Nakano Y, Kobayashi T, Matsuda K, Izumi T,  
457 Misawa N, Shintaku Y, Wetzel KS, Collman RG, Tanaka H, Hirsch VM, Koyanagi Y, Sato  
458 K. 2015. Coevolutionary dynamics between tribe Cercopithecini tetherins and their  
459 lentiviruses. *Sci Rep* 5:16021.
- 460 21. Lim ES, Fregoso OI, McCoy CO, Matsen FA, Malik HS, Emerman M. 2012. The ability of  
461 primate lentiviruses to degrade the monocyte restriction factor SAMHD1 preceded the birth  
462 of the viral accessory protein Vpx. *Cell Host Microbe* 11:194-204.
- 463 22. Meyerson NR, Rowley PA, Swan CH, Le DT, Wilkerson GK, Sawyer SL. 2014. Positive  
464 selection of primate genes that promote HIV-1 replication. *Virology* 454-455:291-8.
- 465 23. Abdul F, Filletton F, Gerossier L, Paturel A, Hall J, Strubin M, Etienne L. 2018. Smc5/6  
466 Antagonism by HBx Is an Evolutionarily Conserved Function of Hepatitis B Virus Infection  
467 in Mammals. *J Virol* doi:10.1128/JVI.00769-18.
- 468 24. Murphy CM, Xu Y, Li F, Nio K, Reszka-Blanco N, Li X, Wu Y, Yu Y, Xiong Y, Su L. 2016.  
469 Hepatitis B Virus X Protein Promotes Degradation of SMC5/6 to Enhance HBV Replication.  
470 *Cell Rep* 16:2846-2854.
- 471 25. Barrera A, Guerra B, Lee H, Lanford RE. 2004. Analysis of host range phenotypes of primate  
472 hepadnaviruses by in vitro infections of hepatitis D virus pseudotypes. *J Virol* 78:5233-43.
- 473 26. Yan H, Zhong G, Xu G, He W, Jing Z, Gao Z, Huang Y, Qi Y, Peng B, Wang H, Fu L, Song  
474 M, Chen P, Gao W, Ren B, Sun Y, Cai T, Feng X, Sui J, Li W. 2012. Sodium taurocholate  
475 cotransporting polypeptide is a functional receptor for human hepatitis B and D virus. *Elife*  
476 1:e00049.
- 477 27. Lucifora J, Vincent IE, Berthillon P, Dupinay T, Michelet M, Protzer U, Zoulim F, Durantel  
478 D, Trepo C, Chemin I. 2010. Hepatitis B virus replication in primary macaque hepatocytes:  
479 crossing the species barrier toward a new small primate model. *Hepatology* 51:1954-60.
- 480 28. Lempp FA, Wiedtke E, Qu B, Roques P, Chemin I, Vondran FWR, Le Grand R, Grimm D,  
481 Urban S. 2017. Sodium taurocholate cotransporting polypeptide is the limiting host factor of  
482 hepatitis B virus infection in macaque and pig hepatocytes. *Hepatology*  
483 doi:10.1002/hep.29112.

- 484 29. Burwitz BJ, Wettengel JM, Muck-Hausl MA, Ringelhan M, Ko C, Festag MM, Hammond  
485 KB, Northrup M, Bimber BN, Jacob T, Reed JS, Norris R, Park B, Moller-Tank S, Esser K,  
486 Greene JM, Wu HL, Abdulhaqq S, Webb G, Sutton WF, Klug A, Swanson T, Legasse AW,  
487 Vu TQ, Asokan A, Haigwood NL, Protzer U, Sacha JB. 2017. Hepatocytic expression of  
488 human sodium-taurocholate cotransporting polypeptide enables hepatitis B virus infection of  
489 macaques. *Nat Commun* 8:2146.
- 490 30. Coffin JM. 2013. Virions at the gates: receptors and the host-virus arms race. *PLoS Biol*  
491 11:e1001574.
- 492 31. Demogines A, Abraham J, Choe H, Farzan M, Sawyer SL. 2013. Dual host-virus arms races  
493 shape an essential housekeeping protein. *PLoS Biol* 11:e1001571.
- 494 32. Ng M, Ndungo E, Kaczmarek ME, Herbert AS, Binger T, Kuehne AI, Jangra RK, Hawkins  
495 JA, Gifford RJ, Biswas R, Demogines A, James RM, Yu M, Brummelkamp TR, Drosten C,  
496 Wang LF, Kuhn JH, Muller MA, Dye JM, Sawyer SL, Chandran K. 2015. Filovirus receptor  
497 NPC1 contributes to species-specific patterns of ebolavirus susceptibility in bats. *Elife* 4.
- 498 33. Iwamoto M, Watashi K, Tsukuda S, Aly HH, Fukasawa M, Fujimoto A, Suzuki R, Aizaki H,  
499 Ito T, Koiwai O, Kusuhara H, Wakita T. 2014. Evaluation and identification of hepatitis B  
500 virus entry inhibitors using HepG2 cells overexpressing a membrane transporter NTCP.  
501 *Biochem Biophys Res Commun* 443:808-13.
- 502 34. Xu B, Yang Z. 2013. PAMLX: a graphical user interface for PAML. *Mol Biol Evol* 30:2723-  
503 4.
- 504 35. Yang Z. 2007. PAML 4: phylogenetic analysis by maximum likelihood. *Mol Biol Evol*  
505 24:1586-91.
- 506 36. Kosakovsky Pond SL, Frost SD. 2005. Not so different after all: a comparison of methods for  
507 detecting amino acid sites under selection. *Mol Biol Evol* 22:1208-22.
- 508 37. Murrell B, Wertheim JO, Moola S, Weighill T, Scheffler K, Kosakovsky Pond SL. 2012.  
509 Detecting individual sites subject to episodic diversifying selection. *PLoS Genet* 8:e1002764.
- 510 38. Souza BF, Drexler JF, Lima RS, Rosario Mde O, Netto EM. 2014. Theories about  
511 evolutionary origins of human hepatitis B virus in primates and humans. *Braz J Infect Dis*  
512 18:535-43.
- 513 39. Dupinay T, Gheit T, Roques P, Cova L, Chevallier-Queyron P, Tasahsu SI, Le Grand R,  
514 Simon F, Cordier G, Wakrim L, Benjelloun S, Trepo C, Chemin I. 2013. Discovery of  
515 naturally occurring transmissible chronic hepatitis B virus infection among *Macaca*  
516 *fascicularis* from Mauritius Island. *Hepatology* 58:1610-20.
- 517 40. Petersen J, Dandri M, Mier W, Lutgehetmann M, Volz T, von Weizsacker F, Haberkorn U,  
518 Fischer L, Pollok JM, Erbes B, Seitz S, Urban S. 2008. Prevention of hepatitis B virus  
519 infection in vivo by entry inhibitors derived from the large envelope protein. *Nat Biotechnol*  
520 26:335-41.
- 521 41. Yan H, Peng B, Liu Y, Xu G, He W, Ren B, Jing Z, Sui J, Li W. 2014. Viral entry of hepatitis  
522 B and D viruses and bile salts transportation share common molecular determinants on  
523 sodium taurocholate cotransporting polypeptide. *J Virol* 88:3273-84.
- 524 42. Taylor JM. 2013. Virus entry mediated by hepatitis B virus envelope proteins. *World J*  
525 *Gastroenterol* 19:6730-4.

- 526 43. Slijepcevic D, Kaufman C, Wichers CG, Gilgioni EH, Lempp FA, Duijst S, de Waart DR,  
527 Elferink RP, Mier W, Stieger B, Beuers U, Urban S, van de Graaf SF. 2015. Impaired uptake  
528 of conjugated bile acids and hepatitis b virus pres1-binding in na(+)-taurocholate  
529 cotransporting polypeptide knockout mice. *Hepatology* 62:207-19.
- 530 44. Muller SF, Konig A, Doring B, Glebe D, Geyer J. 2018. Characterisation of the hepatitis B  
531 virus cross-species transmission pattern via Na<sup>+</sup>/taurocholate co-transporting polypeptides  
532 from 11 New World and Old World primate species. *PLoS One* 13:e0199200.
- 533 45. Zhong G, Yan H, Wang H, He W, Jing Z, Qi Y, Fu L, Gao Z, Huang Y, Xu G, Feng X, Sui J,  
534 Li W. 2013. Sodium taurocholate cotransporting polypeptide mediates woolly monkey  
535 hepatitis B virus infection of *Tupaia* hepatocytes. *J Virol* 87:7176-84.
- 536 46. Yan H, Peng B, He W, Zhong G, Qi Y, Ren B, Gao Z, Jing Z, Song M, Xu G, Sui J, Li W.  
537 2013. Molecular determinants of hepatitis B and D virus entry restriction in mouse sodium  
538 taurocholate cotransporting polypeptide. *J Virol* 87:7977-91.
- 539 47. Lee WM. 1993. Acute liver failure. *N Engl J Med* 329:1862-72.
- 540 48. Becker DJ, Streicker DG, Altizer S. 2015. Linking anthropogenic resources to wildlife-  
541 pathogen dynamics: a review and meta-analysis. *Ecol Lett* 18:483-95.
- 542 49. Daszak P, Berger L, Cunningham AA, Hyatt AD, Green DE, Speare R. 1999. Emerging  
543 infectious diseases and amphibian population declines. *Emerg Infect Dis* 5:735-48.
- 544 50. Tarlinton RE, Meers J, Young PR. 2006. Retroviral invasion of the koala genome. *Nature*  
545 442:79-81.
- 546 51. McCarthy AJ, Shaw MA, Goodman SJ. 2007. Pathogen evolution and disease emergence in  
547 carnivores. *Proc Biol Sci* 274:3165-74.
- 548 52. Compton AA, Malik HS, Emerman M. 2013. Host gene evolution traces the evolutionary  
549 history of ancient primate lentiviruses. *Philos Trans R Soc Lond B Biol Sci* 368:20120496.
- 550 53. Silvestri G, Paiardini M, Pandrea I, Lederman MM, Sodora DL. 2007. Understanding the  
551 benign nature of SIV infection in natural hosts. *J Clin Invest* 117:3148-54.
- 552 54. Arien KK, Vanham G, Arts EJ. 2007. Is HIV-1 evolving to a less virulent form in humans?  
553 *Nat Rev Microbiol* 5:141-151.
- 554 55. de Vries RP, Tzarum N, Peng W, Thompson AJ, Ambepitiya Wickramasinghe IN, de la Pena  
555 ATT, van Breemen MJ, Bouwman KM, Zhu X, McBride R, Yu W, Sanders RW, Verheije  
556 MH, Wilson IA, Paulson JC. 2017. A single mutation in Taiwanese H6N1 influenza  
557 hemagglutinin switches binding to human-type receptors. *EMBO Mol Med* 9:1314-1325.
- 558 56. Teng Q, Xu D, Shen W, Liu Q, Rong G, Li X, Yan L, Yang J, Chen H, Yu H, Ma W, Li Z.  
559 2016. A Single Mutation at Position 190 in Hemagglutinin Enhances Binding Affinity for  
560 Human Type Sialic Acid Receptor and Replication of H9N2 Avian Influenza Virus in Mice. *J*  
561 *Virol* 90:9806-9825.
- 562 57. Kumar S, Stecher G, Tamura K. 2016. MEGA7: Molecular Evolutionary Genetics Analysis  
563 Version 7.0 for Bigger Datasets. *Mol Biol Evol* 33:1870-4.
- 564 58. Guindon S, Dufayard JF, Lefort V, Anisimova M, Hordijk W, Gascuel O. 2010. New  
565 algorithms and methods to estimate maximum-likelihood phylogenies: assessing the  
566 performance of PhyML 3.0. *Syst Biol* 59:307-21.

- 567 59. Lefort V, Longueville JE, Gascuel O. 2017. SMS: Smart Model Selection in PhyML. *Mol*  
568 *Biol Evol* 34:2422-2424.
- 569 60. Delport W, Poon AF, Frost SD, Kosakovsky Pond SL. 2010. Datamonkey 2010: a suite of  
570 phylogenetic analysis tools for evolutionary biology. *Bioinformatics* 26:2455-7.
- 571 61. Shimura S, Watashi K, Fukano K, Peel M, Sluder A, Kawai F, Iwamoto M, Tsukuda S,  
572 Takeuchi JS, Miyake T, Sugiyama M, Ogasawara Y, Park SY, Tanaka Y, Kusuhara H,  
573 Mizokami M, Sureau C, Wakita T. 2017. Cyclosporin derivatives inhibit hepatitis B virus  
574 entry without interfering with NTCP transporter activity. *J Hepatol* 66:685-692.
- 575 62. Ogura N, Watashi K, Noguchi T, Wakita T. 2014. Formation of covalently closed circular  
576 DNA in Hep38.7-Tet cells, a tetracycline inducible hepatitis B virus expression cell line.  
577 *Biochem Biophys Res Commun* 452:315-21.
- 578 63. Watashi K, Liang G, Iwamoto M, Marusawa H, Uchida N, Daito T, Kitamura K, Muramatsu  
579 M, Ohashi H, Kiyohara T, Suzuki R, Li J, Tong S, Tanaka Y, Murata K, Aizaki H, Wakita T.  
580 2013. Interleukin-1 and tumor necrosis factor-alpha trigger restriction of hepatitis B virus  
581 infection via a cytidine deaminase activation-induced cytidine deaminase (AID). *J Biol Chem*  
582 288:31715-27.
- 583 64. Tsukuda S, Watashi K, Hojima T, Isogawa M, Iwamoto M, Omagari K, Suzuki R, Aizaki H,  
584 Kojima S, Sugiyama M, Saito A, Tanaka Y, Mizokami M, Sureau C, Wakita T. 2017. A new  
585 class of hepatitis B and D virus entry inhibitors, proanthocyanidin and its analogs, that  
586 directly act on the viral large surface proteins. *Hepatology* 65:1104-1116.
- 587 65. Kuo MY, Chao M, Taylor J. 1989. Initiation of replication of the human hepatitis delta virus  
588 genome from cloned DNA: role of delta antigen. *J Virol* 63:1945-50.
- 589 66. Sureau C, Guerra B, Lee H. 1994. The middle hepatitis B virus envelope protein is not  
590 necessary for infectivity of hepatitis delta virus. *J Virol* 68:4063-6.
- 591 67. Gudima S, He Y, Meier A, Chang J, Chen R, Jarnik M, Nicolas E, Bruss V, Taylor J. 2007.  
592 Assembly of hepatitis delta virus: particle characterization, including the ability to infect  
593 primary human hepatocytes. *J Virol* 81:3608-17.

594

595



596 **Tables**

|    | accession #    | Scientific name              | <sup>a</sup> Common name | Order                        |
|----|----------------|------------------------------|--------------------------|------------------------------|
| 1  | NM_003049.3    | <i>Homo sapiens</i>          | Human                    |                              |
| 2  | XM_510035.5    | <i>Pan troglodytes</i>       | Chimpanzee               | Primates (Hominoids)         |
| 3  | XM_003824101.2 | <i>Pan paniscus</i>          | Bonobo                   |                              |
| 4  | XM_002824890.2 | <i>Pongo abelii</i>          | Sumatran orangutan       |                              |
| 5  | NM_001283323.1 | <i>Macaca fascicularis</i>   | Cynomolgus macaque       |                              |
| 6  | KT382283.1     | <i>Papio hamadryas</i>       | Hamadryas baboon         | Primates (Old-World monkeys) |
| 7  | KT382281.1     | <i>Chlorocebus aethiops</i>  | Grivet                   |                              |
| 8  | KT326157.1     | <i>Semnopithecus sp.</i>     | Gray langur              |                              |
| 9  | KT382285.1     | <i>Callithrix jacchus</i>    | Marmoset                 |                              |
| 10 | KT382284.1     | <i>Saguinus oedipus</i>      | Cotton-top tamarin       | Primates (New-World monkeys) |
| 11 | KR153327.1     | <i>Saimiri sciureus</i>      | Squirrel monkey          |                              |
| 12 | XM_006091030.2 | <i>Myotis lucifugus</i>      | Little brown bat         | Chiroptera                   |
| 13 | XM_005877950.2 | <i>Myotis brandtii</i>       | Brandt's bat             |                              |
| 14 | XM_008138900.1 | <i>Eptesicus fuscus</i>      | Big brown bat            |                              |
| 15 | XM_006915181.2 | <i>Pteropus alecto</i>       | Black flying fox         |                              |
| 16 | JQ608471.1     | <i>Tupaia belangeri</i>      | Northern treeshrew       | Scandentia                   |
| 17 | NM_001082768.1 | <i>Oryctolagus cuniculus</i> | European rabbit          | Lagomorpha                   |
| 18 | XM_015490579.1 | <i>Marmota marmota</i>       | Alpine marmot            |                              |
| 19 | NM_017047.1    | <i>Rattus norvegicus</i>     | Brown rat                | Rodentia                     |
| 20 | NM_001177561.1 | <i>Mus musculus</i>          | House mouse              |                              |

597

598 **Table 1. GenBank accession numbers of mammalian NTCP sequences used in this study.** <sup>a</sup>The

599 common name of each mammal is identical to that in Figure 1.

600

| Model | lnL       | 2ΔlnL  | p value | Estimated parameters                                                                          | Positive selection sites |
|-------|-----------|--------|---------|-----------------------------------------------------------------------------------------------|--------------------------|
| M0    | -5972.703 |        |         | $\omega = 0.344$                                                                              |                          |
| M1a   | -5868.144 |        |         | $p_0 = 0.667, p_1 = 0.333$<br>$\omega_0 = 0.085, \omega_1 = 1$                                |                          |
| M2a   | -5863.300 | 9.687  | < 0.01  | $p_0 = 0.662, p_1 = 0.331, p_2 = 0.007$<br>$\omega_0 = 0.086, \omega_1 = 1, \omega_2 = 4.526$ | K157, A351               |
| M7    | -5868.087 |        |         | $p = 0.237, q = 0.430$                                                                        |                          |
| M8    | -5862.086 | 12.002 | < 0.005 | $p_0 = 0.991, p = 0.252, q = 0.469$<br>$p_1 = 0.009, \omega = 3.784$                          | K157, A351               |

601

602 **Table 2. Log likelihood values and estimated parameters under models in PAML.** Two pairs of  
603 site-models with CODEML implemented in the PAML ver. 4.8 were performed: the first pair employed  
604 M1a (neutral, 2 site classes,  $\omega > 1$  not allowed) versus M2a (selection, 3 site classes,  $\omega > 1$  allowed),  
605 and the second pair consisted of M7 (neutral, 10 site classes,  $\omega > 1$  not allowed) versus M8 (selection,  
606 11 site classes,  $\omega > 1$  allowed).

607

| <sup>a</sup> site | FEL dN-dS | <sup>b</sup> FEL p-value | REL dN-dS | <sup>c</sup> REL Bayes Factor | MEME $\omega+$ | <sup>d</sup> MEME p-value |
|-------------------|-----------|--------------------------|-----------|-------------------------------|----------------|---------------------------|
| 25                | 3.03      | 0.056                    | 0.32      | 9.987                         | >100           | 0.034                     |
| 62                | 0.575     | 0.278                    | -0.094    | 6.955                         | >100           | 0.087                     |
| 107               | 2.268     | 0.045                    | 0.31      | 12.91                         | >100           | 0.062                     |
| 129               | 2.834     | 0.014                    | 1.08      | 37.539                        | >100           | 0.022                     |
| <u>142</u>        | 1.127     | 0.156                    | -0.018    | 8.682                         | >100           | 0                         |
| <u>157</u>        | 4.646     | 0.004                    | 1.843     | 2566.71                       | >100           | 0.007                     |
| <u>158</u>        | 1.311     | 0.3                      | -0.158    | 4.877                         | >100           | 0.05                      |
| <u>160</u>        | 0.959     | 0.437                    | -0.21     | 4.018                         | >100           | 0.061                     |
| <u>165</u>        | 1.673     | 0.095                    | 0.06      | 9.433                         | >100           | 0.071                     |
| 166               | 1.152     | 0.067                    | 0.188     | 23.465                        | >100           | 0.088                     |
| 175               | 2.486     | 0.051                    | 0.475     | 13.608                        | >100           | 0.064                     |
| 184               | -1.037    | 0.275                    | -0.783    | 0.55                          | >100           | 0.038                     |
| 198               | 1.592     | 0.099                    | 0.031     | 8.999                         | >100           | 0.11                      |
| 207               | 1.491     | 0.087                    | 0.044     | 10.293                        | >100           | 0.11                      |
| 210               | 0.044     | 0.966                    | -0.286    | 3.225                         | >100           | 0.047                     |
| 223               | 2.671     | 0.051                    | 0.22      | 7.959                         | >100           | 0.001                     |
| 248               | 1.896     | 0.03                     | 0.275     | 19.36                         | >100           | 0.043                     |
| 308               | -0.797    | 0.634                    | -0.401    | 1.487                         | 25.428         | 0.095                     |
| 330               | 1.321     | 0.085                    | 0.104     | 13.859                        | >100           | 0.11                      |
| 333               | 0.883     | 0.094                    | 0.175     | 23.698                        | >100           | 0.047                     |
| 334               | 1.05      | 0.098                    | 0.146     | 18.083                        | >100           | 0.122                     |
| 339               | 1.723     | 0.044                    | 0.172     | 15.24                         | >100           | 0.062                     |
| 342               | 1.03      | 0.169                    | -0.022    | 8.713                         | >100           | 0.077                     |
| 347               | 1.956     | 0.212                    | -0.044    | 4.988                         | >100           | 0.001                     |
| 348               | 0.719     | 0.699                    | -0.166    | 2.831                         | >100           | 0.008                     |
| 351               | 1.961     | 0.705                    | 1.346     | 743.714                       | >100           | 0.003                     |
| 352               | 0.739     | 0.5                      | -0.187    | 3.923                         | 25.945         | 0.048                     |

608

609 **Table 3. Positively selected sites inferred under FEL, REL, and MEME.** FEL, REL, and MEME  
610 were employed to detect the positively selected sites through the DATAMONKEY webserver.  
611 <sup>a</sup>Codons that varied between human (NM\_003049.3) and cynomolgus macaque (NM\_001283323.1)  
612 *NTCP* genes are underlined. <sup>b,c,d</sup>The following default significant cut-off values were used and are  
613 shown in red: p-value < 0.1 for FEL, Bayes factor > 50 for REL, and p-value < 0.1 for MEME.

614

615

616 **Figure legends**

617

618 **Figure 1. Maximum Likelihood tree of the 20 NTCP sequences analyzed in this study.** A  
619 Maximum Likelihood (ML) tree of 20 mammalian full-length NTCP sequences was reconstructed  
620 using PhyML 3.0 with 1,000 bootstrap resamplings. The corresponding GenBank accession numbers  
621 are listed in Table 1. The indicated amino acid sequences correspond to the amino acid at residue 158  
622 in each NTCP species.

623

624 **Figure 2. Comparison between human and macaque NTCPs.** Schematic representation of the  
625 primary amino acid sequence of NTCP. The 13 amino acid positions at which human (NM\_003049.3)  
626 and cynomolgus macaque (NM\_001283323.1) sequences differ are indicated by the numbers above  
627 the box showing the NTCP protein and the vertical lines (in red and blue). Among these 13 positions,  
628 five residues (indicated in red) were inferred to be under positive selection in the 20 mammalian  
629 sequences evaluated in this study. The amino acid sequences at residue 142 and 157-165 are compared  
630 between human and cynomolgus macaque, as shown under the box. The indicated numbers correspond  
631 to the amino acid positions in human NTCP.

632

633 **Figure 3. NTCP expression and the transporter activity.** (A, C) Left panels, schematic  
634 representation of NTCP variants. Black and blue boxes/amino acids indicate those from human and  
635 macaque, respectively. The constructs shown in (A) and (C) are variants in which hNTCP (black) and  
636 mNtcp (blue) were used as backbones, respectively. Amino acid positions under positive selection are  
637 shown in red at the top of the scheme. Right panels, western blotting was used to assess the expression

638 level of Myc/His-tagged NTCP or its variants in HepG2 cells transfected with the respective construct.  
639 Actin was used as an internal control. (B, D) Transporter activities of NTCP in these cells were  
640 measured by transporter assay using [<sup>3</sup>H]-taurocholic acid as a substrate in either sodium-free buffer  
641 (lane 1; to determine background level) or sodium-containing buffer (lanes 2-10). Normalized  
642 transporter activities are shown, and were calculated by dividing the detected radioactivity values by  
643 NTCP expression levels determined by immunofluorescence analysis. Results are presented as mean  
644 ± SEM (n=3).

645

646 **Figure 4. A single positive selection site on NTCP, at aa 158, is a key determinant for supporting**  
647 **HBV infection.** Left, Schematic representation of the wild-type and variants of hNTCP (A) and mNtcp  
648 (B) (black: human-type residues; blue: macaque-type residues). Middle graphs, HBV susceptibility in  
649 HepG2 cells expressing each NTCP construct was determined by detecting HBc-positive cells; the  
650 detected value was normalized to the NTCP expression level in the same cell line. Right panels, HBc  
651 (red) and the nucleus (cyan) were detected in the HBV infection assay by immunofluorescence analysis  
652 in the presence or absence of Myr-B, an HBV entry inhibitor. On the right, the inability or ability to  
653 support HBV infection (without Myr-B) for each construct is summarized with - or +, respectively.

654

655 **Figure 5. A single positive selection site on NTCP is critical for HBV envelope binding.** Left,  
656 Schematic representation of hNTCP (A) or mNtcp (B) variants (black: human-type residues, blue:  
657 macaque-type residues). Middle graphs, preS1-cell binding mediated by NTCP mutants. The relative  
658 amounts of preS1-cell binding were determined by counting preS1-attached cells (red, right panels),  
659 and the values were normalized to NTCP expression levels (green, right panels) in the respective cell  
660 lines. Right panels, preS1 peptide-cell binding was examined by preS1 binding assay (red) either in

661 the presence or absence of Myr-B. Expression levels of Myc/His-tagged NTCP were simultaneously  
662 visualized by immunofluorescence analysis (green).

663

664 **Figure 6. A single positive selection site in NTCP determines HDV susceptibility.** Left, schematic  
665 representation of hNTCP (A) or mNtcp (B) variants (black: human-type residues; blue: macaque-type  
666 residues). Right graphs, HDV infection assay for determining the susceptibility to HDV infection of  
667 HepG2 cells expressing each NTCP. Intracellular HDV RNA was normalized by the NTCP expression  
668 level in the respective cell line. Results are presented as mean  $\pm$  SEM (n=3).

669

Fig. 1

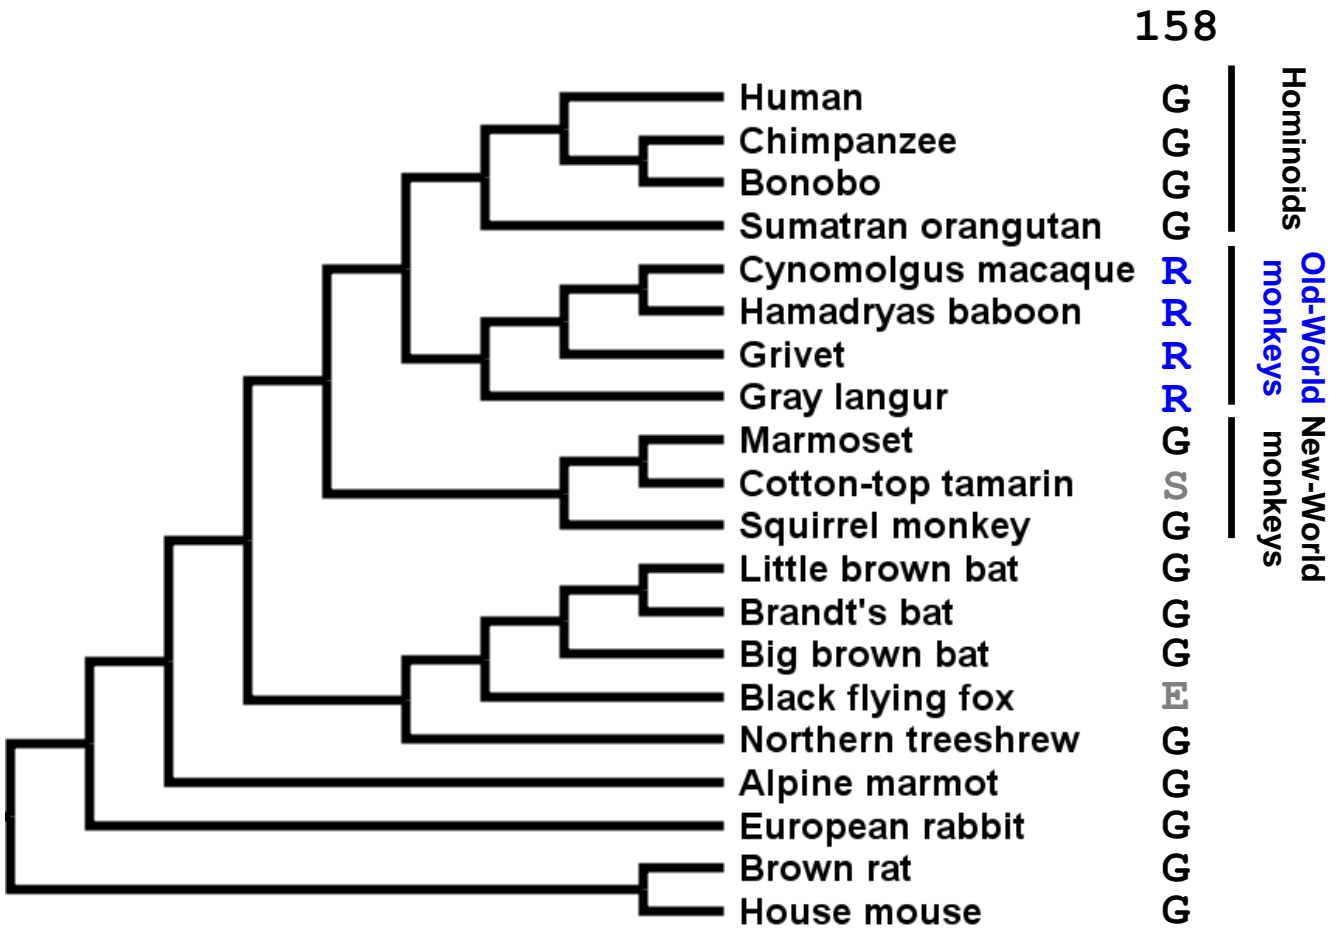

Fig. 2

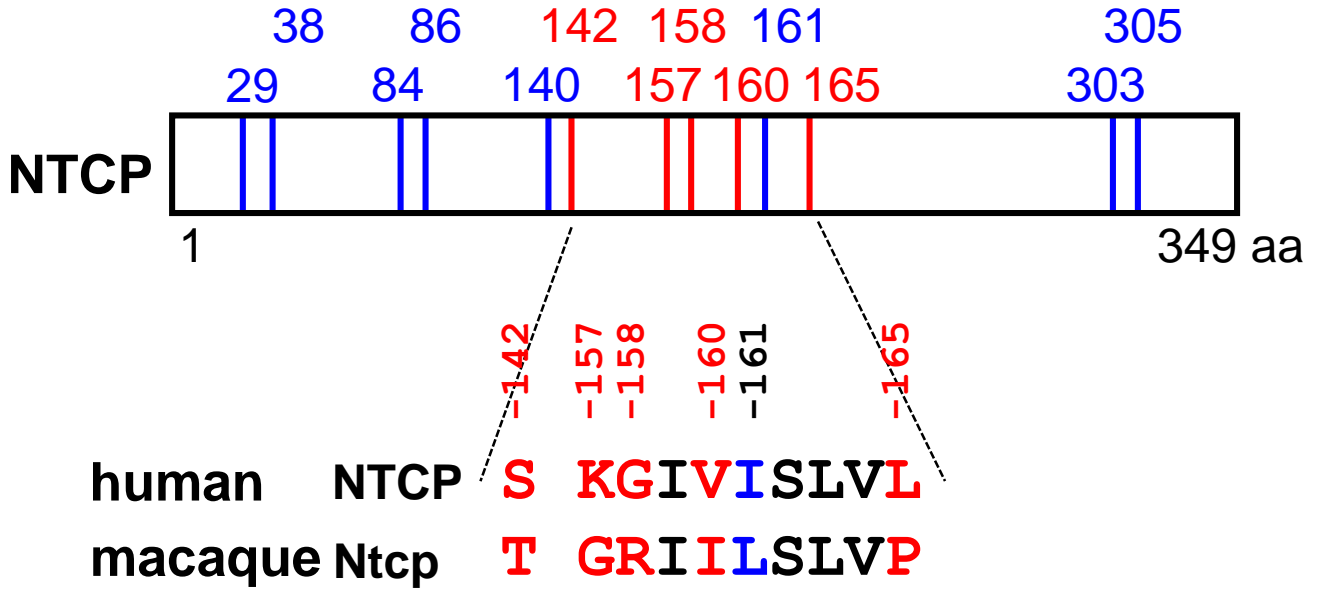

Red: positive selection sites

Blue: residues that differ between the two sequences



### A hNTCP expression

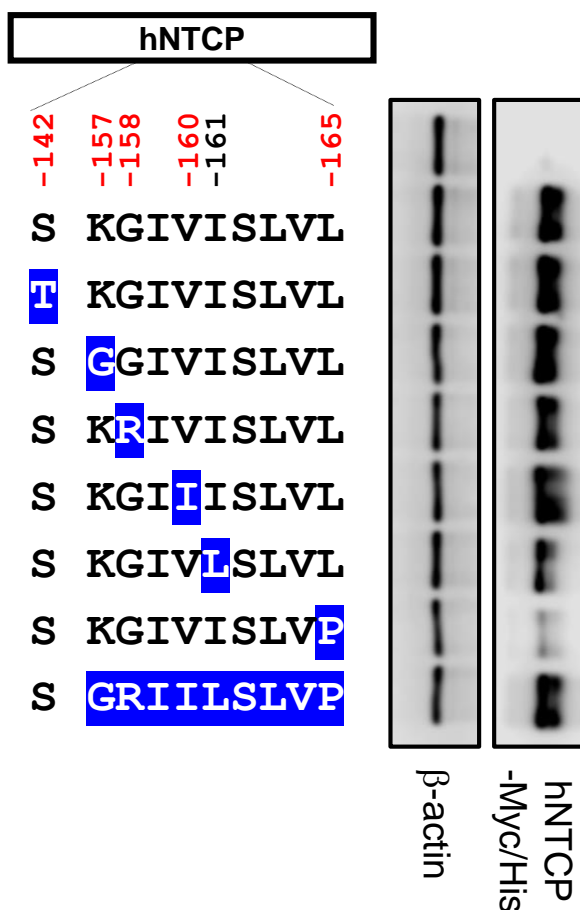

### B hNTCP transporter activity

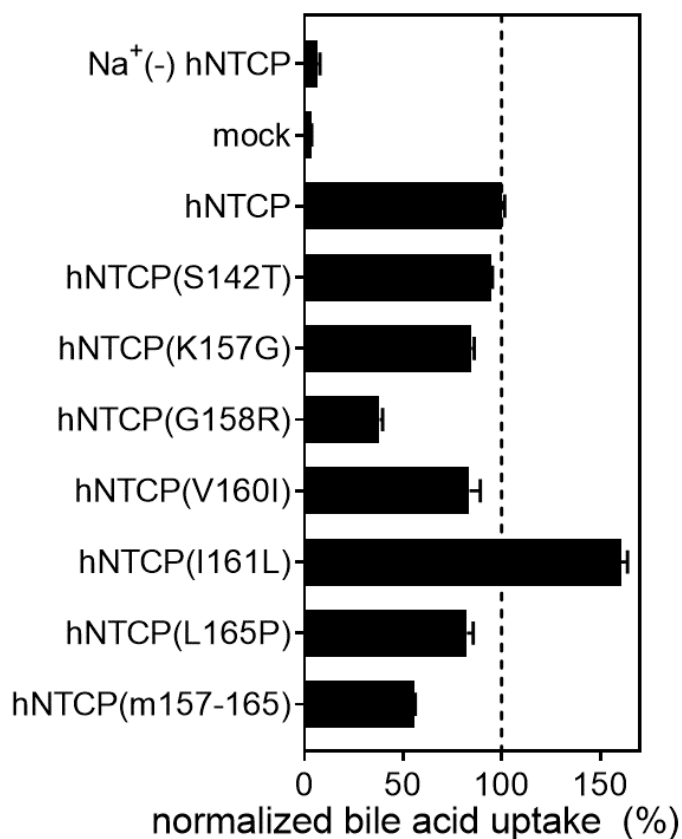

### C mNtcp expression

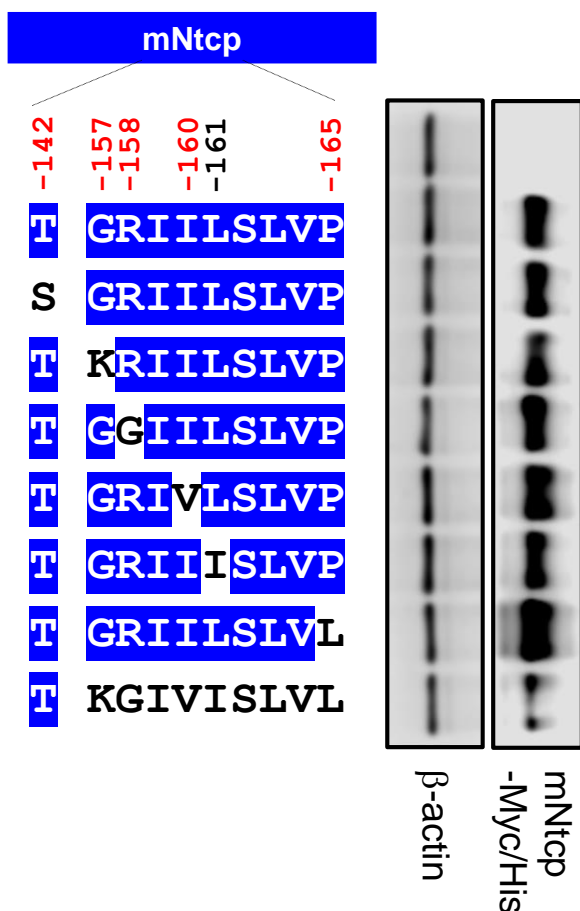

### D mNtcp transporter activity

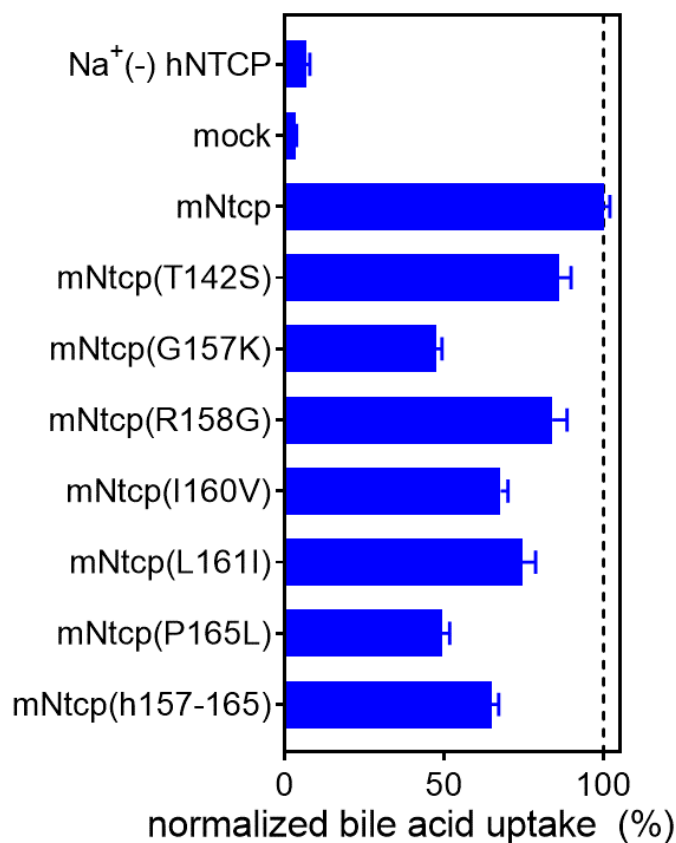

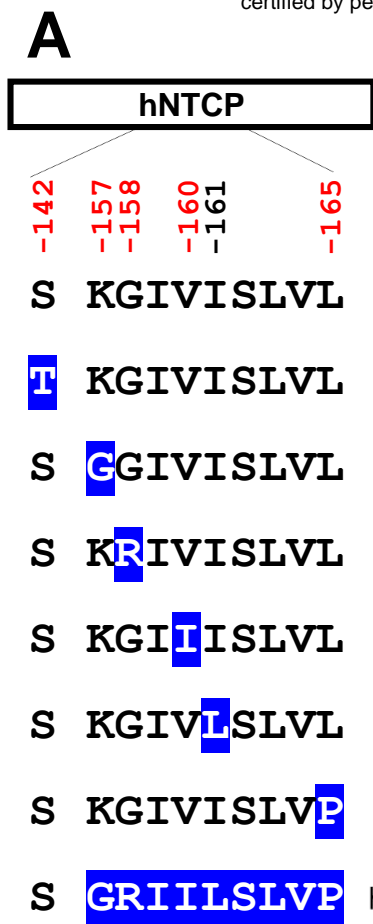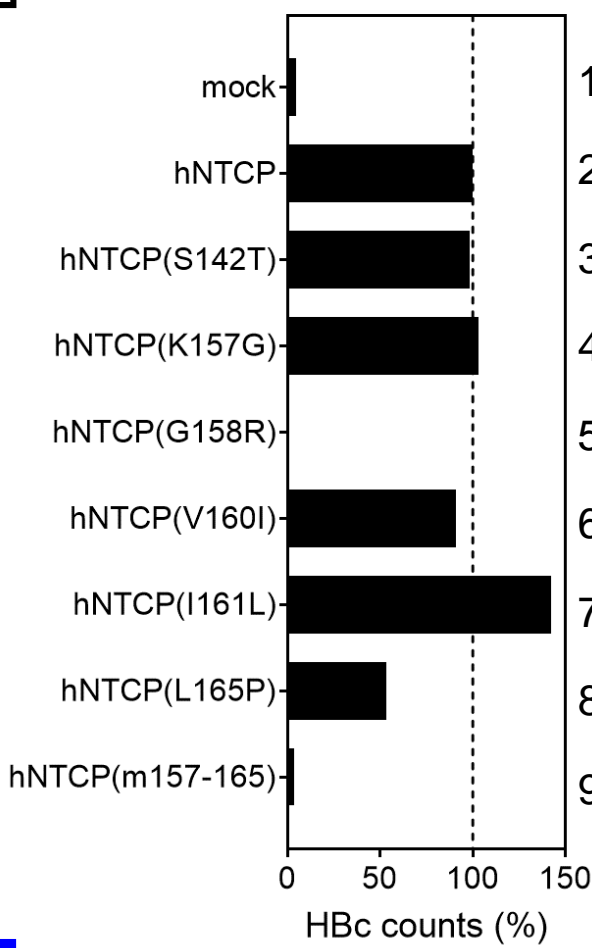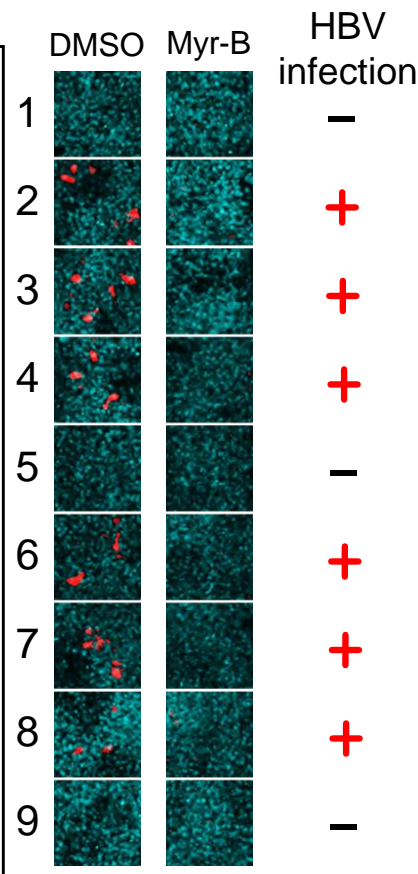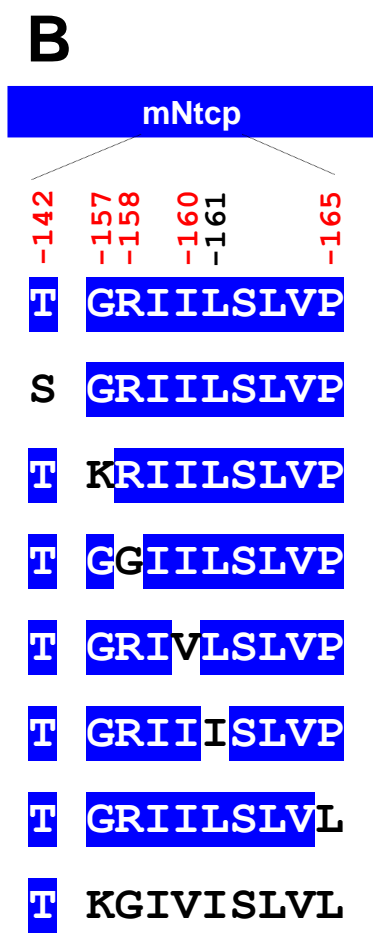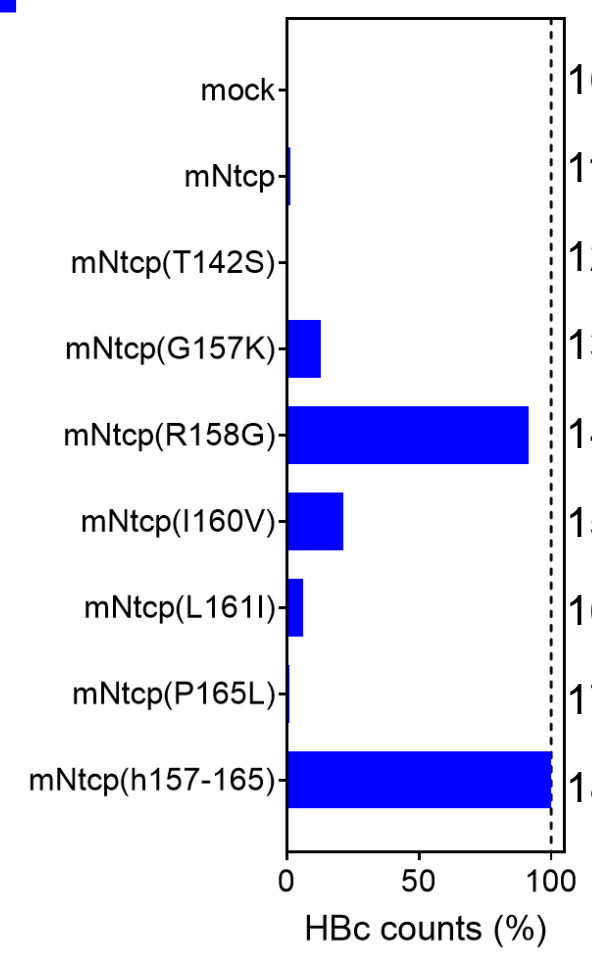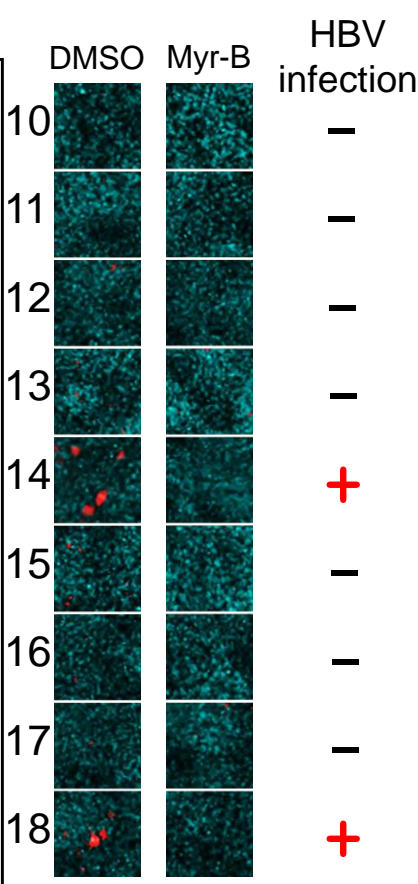

Red: HBc  
Cyan: nucleus

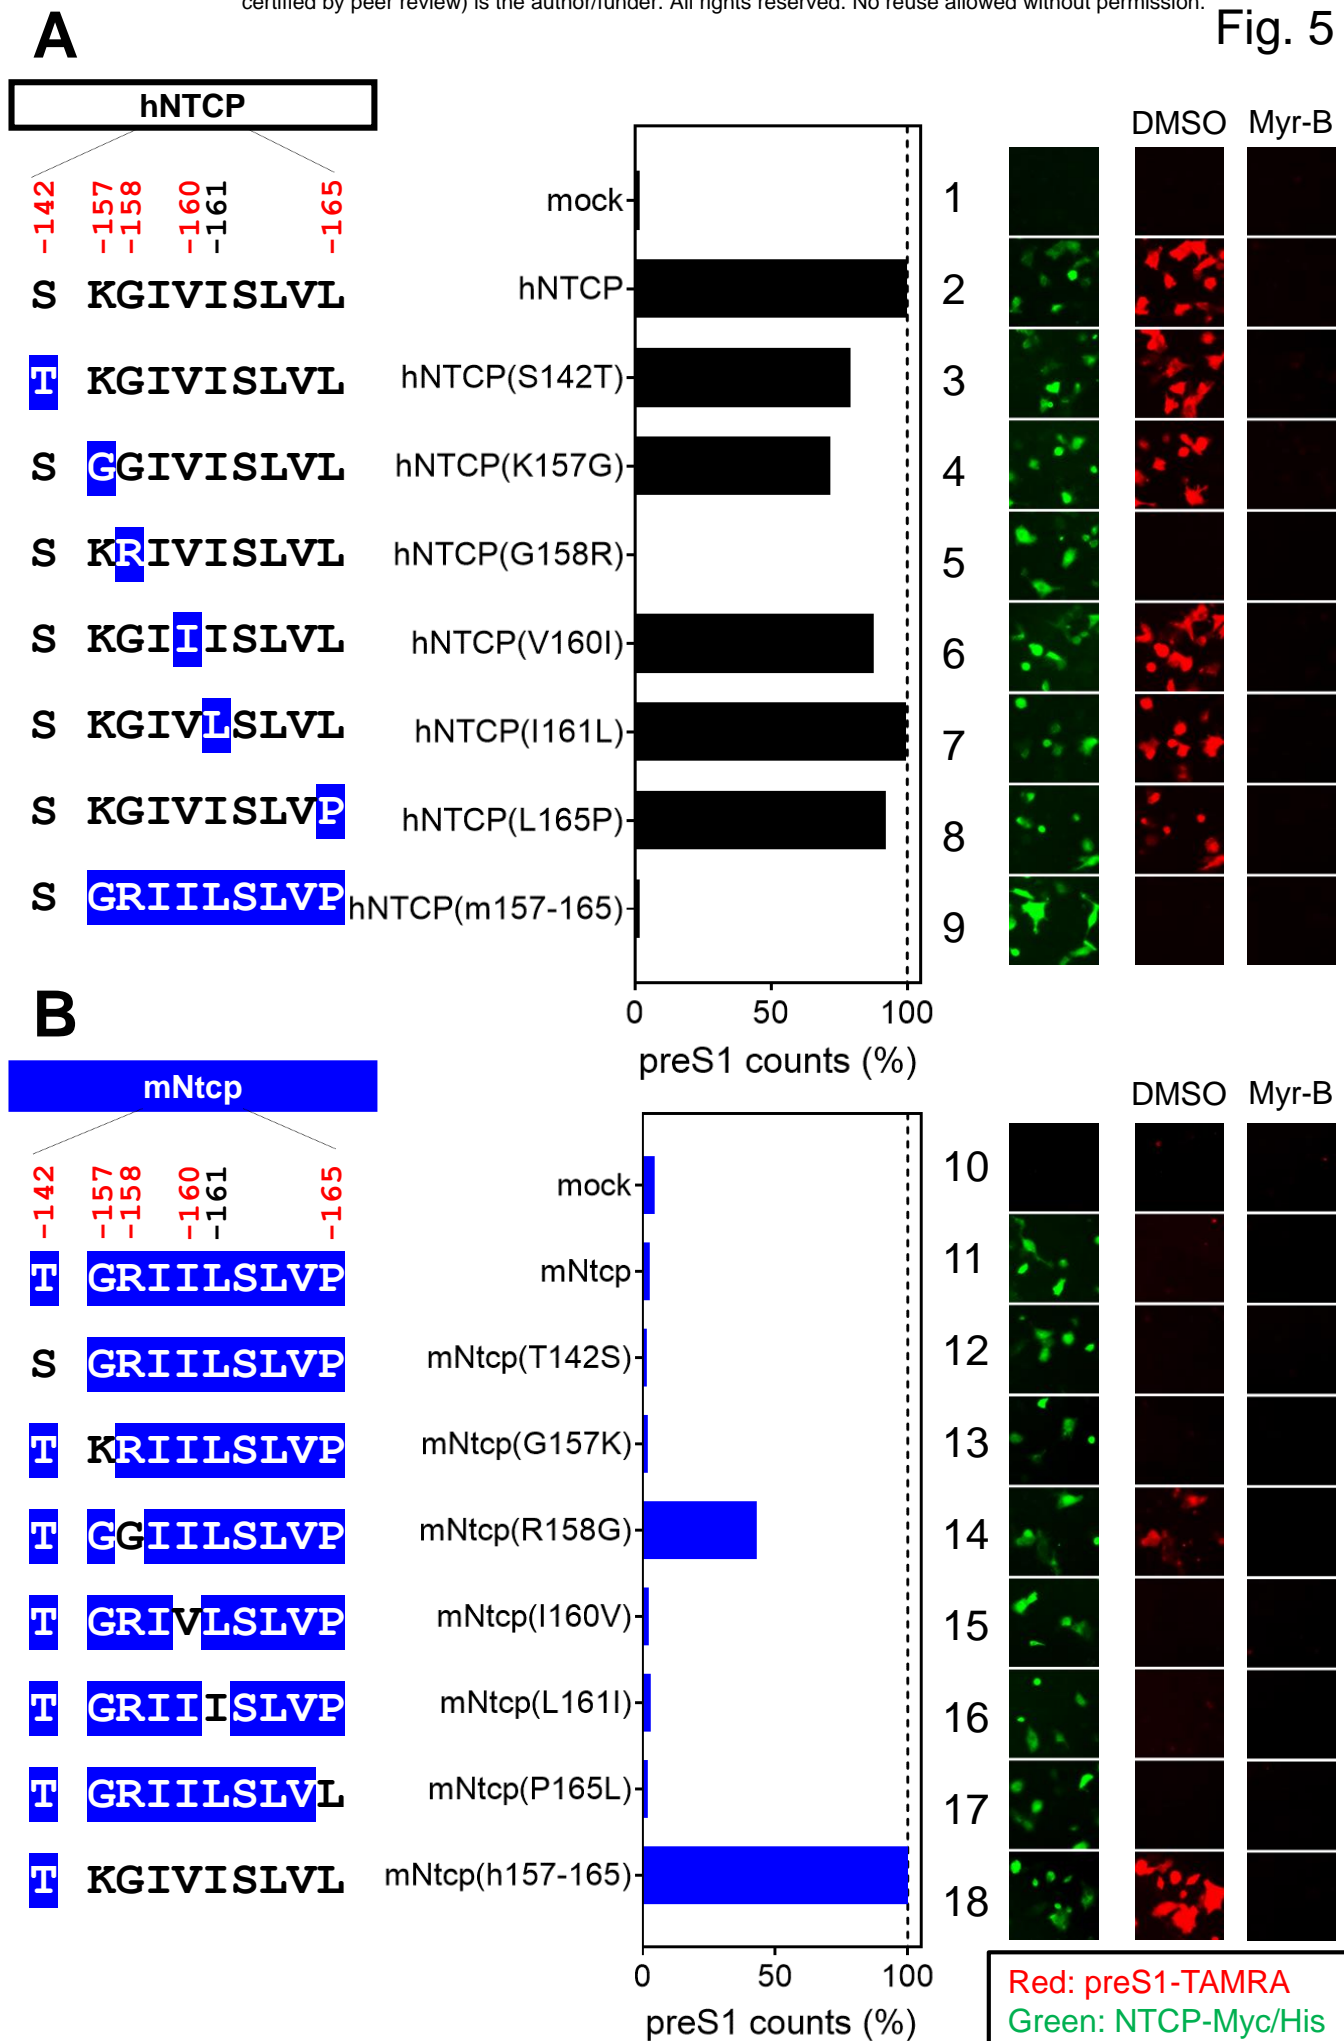

**A**

**hNTCP**

-142 -157 -158 -160 -161 -165

S KGIVISLVL

**F** KGIVISLVL

S **G**GIVISLVL

S **K**RIVISLVL

S KGI**I**ISLVL

S KGIV**L**SLVL

S KGIVISL**V**P

S **GRIIL**SLVP

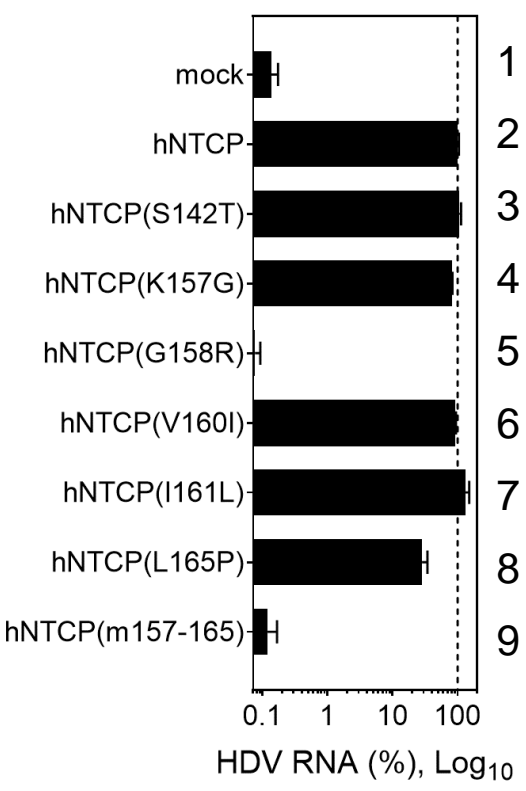

**B**

**mNtcp**

-142 -157 -158 -160 -161 -165

**F** **GRIIL**SLVP

S **GRIIL**SLVP

**T** **KRIIL**SLVP

**T** **GGIIL**SLVP

**T** **GRIIV**SLVP

**T** **GRIII**SLVP

**T** **GRIIL**SLVL

**T** KGIVISLVL

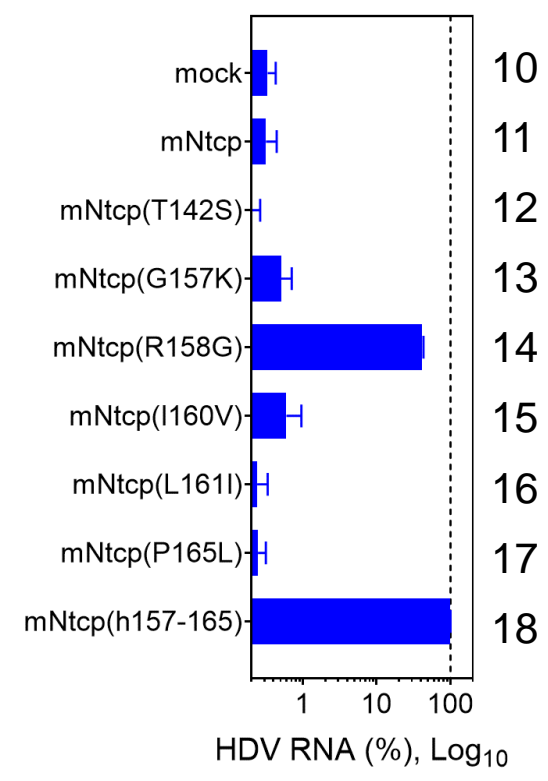

Source: http://biorxiv.org/content/10.1101/391490v1.full.pdf
